## Addendum

**Addendum: Impact of BMI on the outcome of metastatic breast cancer patients treated with everolimus: a retrospective exploratory analysis of the BALLEET study**

**Silvia P. Corona<sup>1</sup>, Fabiola Giudici<sup>1,2</sup>, Guy Jerusalem<sup>3</sup>, Eva Ciruelos<sup>4</sup>, Carla Strina<sup>5</sup>, Marianna Sirico<sup>6</sup>, Ottavia Bernocchi<sup>1</sup>, Manuela Milani<sup>5</sup>, Martina Dester<sup>5</sup>, Nicoletta Ziglioli<sup>5</sup>, Giuseppina Barbieri<sup>5</sup>, Valeria Cervoni<sup>5</sup>, Filippo Montemurro<sup>7</sup> and Daniele Generali<sup>1,5</sup>**

<sup>1</sup>Department of Medicine, Surgery and Health Sciences, University of Trieste, Cattinara Hospital, Trieste, Italy

<sup>2</sup>Unit of Biostatistics, Epidemiology and Public Health, Department of Cardiac, Thoracic, Vascular Sciences and Public Health, University of Padua, Padua, Italy

<sup>3</sup>CHU Sart Tilman Liège and Liège University, Liège, Belgium

<sup>4</sup>Hospital Universitario 12 de Octubre, Madrid, Spain

<sup>5</sup>Multidisciplinary Unit of Breast Pathology and Translational Research, Cremona Hospital, Cremona, Italy

<sup>6</sup>Università Cattolica del Sacro Cuore, Roma, Italy

<sup>7</sup>Multidisciplinary Outpatient Oncology Clinic, Candiolo Cancer Institute, FPO-IRCCS, Candiolo, Italy

**Published:** December 06, 2022

**Copyright:** © 2022 Corona et al. This is an open access article distributed under the terms of the [Creative Commons Attribution License](#) (CC BY 3.0), which permits unrestricted use, distribution, and reproduction in any medium, provided the original author and source are credited.

**This article has an addendum:** Written informed consent was obtained from all patients. The study protocol was approved by an independent ethics committee or institutional review board at each site.

Original article: Oncotarget. 2020; 11:2172–2181. <https://doi.org/10.18632/oncotarget.27612>
